# Supplementary material for: Circulating MicroRNA‐188, ‐30a, and ‐30e as Early Biomarkers for Contrast‐Induced Acute Kidney Injury
Source: PubMed Central journal article supplement — J Am Heart Assoc. 2016 Aug 15;5(8):e004138. doi: 10.1161/JAHA.116.004138 (PMC5015315; doi:10.1161/jaha.116.004138), 2016-08-15
Supplement: JAH3-5-e004138-s001.pdf [file JAH3-5-e004138-s001.pdf]

## SUPPLEMENTAL MATERIAL

Table S1. Temporal changes of candidate miRNAs in plasma from 9 patients with acute myocardial infarction receiving emergency PCI.

| Hours after PCI | Fold change from baseline (fold) * |            |            |
|-----------------|------------------------------------|------------|------------|
|                 | miR-188-5p                         | miR-30a-5p | miR-30e-5p |
| Baseline        | 1                                  | 1          | 1          |
| 4h              | 4.93±1.83                          | 4.67±1.67  | 4.42±1.57  |
| 8h              | 2.85±1.32                          | 3.31±1.56  | 3.02±1.68  |
| 12h             | 1.28±0.48                          | 2.68±0.96  | 1.78±0.65  |
| 24h             | 1.67±0.45                          | 2.22±0.72  | 1.62±0.45  |

\* Levels of miRNAs are expressed as fold change relative to the patients' corresponding baselines. PCI, percutaneous coronary intervention.

Table S2. Clinical characteristics of enrolled CI-AKI cases and remaining CI-AKI cases.

|                           | Enrolled<br>AKI (n=71) | CI-<br>Remaining<br>CI-AKI (n=64) | <i>p</i> -value |
|---------------------------|------------------------|-----------------------------------|-----------------|
| Age (years)               | 60.82±1.27             | 64.34±1.29                        | 0.054           |
| Male, n (%)               | 45 (63.38)             | 35(54.69)                         | 0.305           |
| Current smoker, n (%)     | 23 (32.39)             | 15(23.44)                         | 0.248           |
| HBP, n (%)                | 44 (61.97)             | 49(76.56)                         | 0.067           |
| DM, n (%)                 | 21 (29.58)             | 24(37.50)                         | 0.330           |
| Hyperlipidemia, n (%)     | 25 (35.21)             | 24(37.50)                         | 0.782           |
| Prior MI, n (%)           | 12 (16.90)             | 6 (9.38)                          | 0.217           |
| Prior PCI, n (%)          | 20 (28.17)             | 10 (15.63)                        | 0.099           |
| Systolic pressure (mmHg)  | 130.24±2.26            | 133.18±1.48                       | 0.642           |
| Diastolic pressure (mmHg) | 77.20±1.15             | 79.44±1.32                        | 0.738           |
| ACS, n (%)                | 28 (39.44)             | 17 (26.56)                        | 0.113           |
| ACEI, n (%)               | 37 (52.11)             | 40(62.50)                         | 0.223           |
| Statin, n (%)             | 64 (90.14)             | 63(98.43)                         | 0.065           |
| CM volume (mL)            | 100.99±7.16            | 93.38±5.13                        | 0.286           |
| CKD stage                 |                        |                                   |                 |

|                                               |             |             |       |
|-----------------------------------------------|-------------|-------------|-------|
| 1                                             | 56 (78.87)  | 35(54.68)   | 0.003 |
| 2                                             | 13 (18.31)  | 20(31.25)   | 0.108 |
| 3                                             | 2 (2.82)    | 9(14.06)    | 0.025 |
| Mehran Score                                  | 3.90±0.37   | 4.77±0.46   | 0.145 |
| <6                                            | 55 (77.46)  | 40(62.50)   | 0.057 |
| 6-10                                          | 14 (19.72)  | 13(20.31)   | 0.931 |
| 11-16                                         | 1 (1.41)    | 10(15.63)   | 0.003 |
| >16                                           | 1 (1.41)    | 1(1.56)     | 1.000 |
| Baseline SCr (mg/dL)                          | 0.72±0.02   | 0.96±0.16   | 0.129 |
| Baseline CyC (mg/L)                           | 0.89±0.05   | 1.21±0.15   | 0.063 |
| Baseline eGFR<br>(mL/min/1.73m <sup>2</sup> ) | 113.72±3.80 | 101.26±4.35 | 0.056 |

---

CI-AKI, contrast-induced acute kidney injury; HBP, high blood pressure; DM, diabetes mellitus; MI, myocardial infarction; PCI, percutaneous coronary intervention; ACS, acute coronary syndrome; ACEI, angiotensin-converting-enzyme inhibitor; CM, contrast medium; CKD, chronic kidney disease; SCr, serum creatinine; CyC, Cystatin C.

Table S3. Plasma miRNA levels at baseline detected by RT-qPCR.

|            | Cq value by RT-qPCR |            |            |
|------------|---------------------|------------|------------|
|            | miR-188-5p          | miR-30a-5p | miR-30e-5p |
| Total      | 33.45±1.55          | 29.05±1.40 | 28.64±1.47 |
| CI-AKI     | 33.60±1.60          | 29.25±1.59 | 28.74±1.60 |
| non CI-AKI | 33.30±1.49          | 28.85±1.15 | 28.54±1.33 |
| DM         | 32.87±1.82          | 28.75±1.09 | 28.46±1.32 |
| non DM     | 33.68±1.37*         | 29.18±1.49 | 28.73±1.52 |
| CKD stage  |                     |            |            |
| 1          | 33.44±1.53          | 29.04±1.46 | 28.62±1.53 |
| 2          | 33.73±1.49          | 29.15±1.23 | 28.78±1.27 |
| 3          | 31.78±1.55          | 28.86±0.38 | 28.34±0.87 |
| Age        |                     |            |            |
| <50        | 34.34±1.61          | 29.45±1.41 | 29.02±1.55 |
| 50-70      | 33.31±1.49†         | 28.92±1.46 | 28.61±1.57 |
| >70        | 33.30±1.52‡         | 29.24±1.12 | 28.74±1.20 |

\* P <0.05 vs. DM group. † P <0.05 vs. Age < 50 group. ‡ P <0.05 vs. Age < 50 group.

RT-qPCR, reverse transcription quantitative real-time PCR; CI-AKI, contrast-induced acute kidney injury; DM, diabetes mellitus; CKD, chronic kidney disease; Cq, quantification cycle.

Table S4. The relative change in miRNA levels compared with baseline in subgroups categorized by different CI-AKI criteria.

|                  | SCr(-) &<br>CyC(-) | SCr(+) OR<br>CyC(+) | SCr(+)    | CyC(+)    | SCr(+) &<br>CyC(+) |
|------------------|--------------------|---------------------|-----------|-----------|--------------------|
| N                | 71                 | 71                  | 17        | 64        | 10                 |
| miRNA-188-<br>5p | 0.77±0.01          | 2.36±0.03           | 2.52±0.44 | 2.45±0.29 | 3.16±0.52          |
| miRNA-30a-<br>5p | 0.68±0.01          | 3.26±0.05           | 3.51±0.69 | 3.36±0.48 | 4.28±0.79          |
| miRNA-30e-<br>5p | 0.74±0.01          | 3.03±0.04           | 3.65±0.87 | 3.13±0.39 | 4.77±1.24          |

Levels of miRNAs are expressed as fold change relative to the patients' corresponding baselines.

CI-AKI, contrast-induced acute kidney injury; N, number; SCr(+), meeting the SCr-based CI-AKI criteria: an absolute increase in SCr  $\geq 0.3$  mg/dL or relative increase in SCr  $\geq 25\%$  over baseline; SCr(-), not meeting the SCr-based CI-AKI criteria; CyC(+), meeting the CyC-based CI-AKI criteria: relative increase in CyC  $\geq 10\%$  over baseline; CyC(-), not meeting the CyC-based CI-AKI criteria.

Table S5. The association of the change of miRNA levels and CI-AKI by logistic regression analysis.

| Variables                          | miRNA-188-5p           |          | miRNA-30a-5p           |          | miRNA-30e-5p           |          |
|------------------------------------|------------------------|----------|------------------------|----------|------------------------|----------|
|                                    | OR<br>(95% CI)         | <i>P</i> | OR<br>(95% CI)         | <i>P</i> | OR<br>(95% CI)         | <i>P</i> |
| miRNA*                             | 4.238<br>(2.194-8.185) | <0.001   | 3.931<br>(2.153-7.178) | <0.001   | 4.261<br>(2.287-7.940) | <0.001   |
| Age, year                          | 0.990<br>(0.951-1.031) | 0.629    | 0.980<br>(0.939-1.023) | 0.363    | 0.986<br>(0.944-1.029) | 0.515    |
| eGFR,<br>ml/min/1.73m <sup>2</sup> | 1.004<br>(0.988-1.020) | 0.615    | 1.013<br>(0.997-1.029) | 0.117    | 1.011<br>(0.995-1.028) | 0.166    |

\*, as fold change of miRNA level relative to the patients' corresponding baselines.

CI-AKI, contrast-induced acute kidney injury; OR, odd ratio; CI, confidence interval;

eGFR, estimated glomerular filtration rate.

Table S6. Comparison between the three selected miRNAs in CI-AKI prediction (n=142).

| N (%)                      | miRNA-188-5p | miRNA-30a-5p | miRNA-30e-5p |
|----------------------------|--------------|--------------|--------------|
| <b>Consistent:</b>         |              |              |              |
| 31 (21.83%)                | +            | +            | +            |
| 83 (58.45%)                | -            | -            | -            |
| <b>Total: 114 (80.28%)</b> |              |              |              |
| <b>Inconsistent:</b>       |              |              |              |
| 0 (0.00%)                  | +            | +            | -            |
| 4 (2.82%)                  | +            | -            | +            |
| 12 (8.45%)                 | -            | +            | +            |
| 7 (4.93%)                  | +            | -            | -            |
| 1 (0.70%)                  | -            | +            | -            |
| 4 (2.82%)                  | -            | -            | +            |
| <b>Total: 28 (19.72%)</b>  |              |              |              |

CI-AKI, contrast-induced acute kidney injury; N, number; “+,” meeting the miRNA-based CI-AKI criteria; “-,” not meeting the miRNA-based CI-AKI criteria.



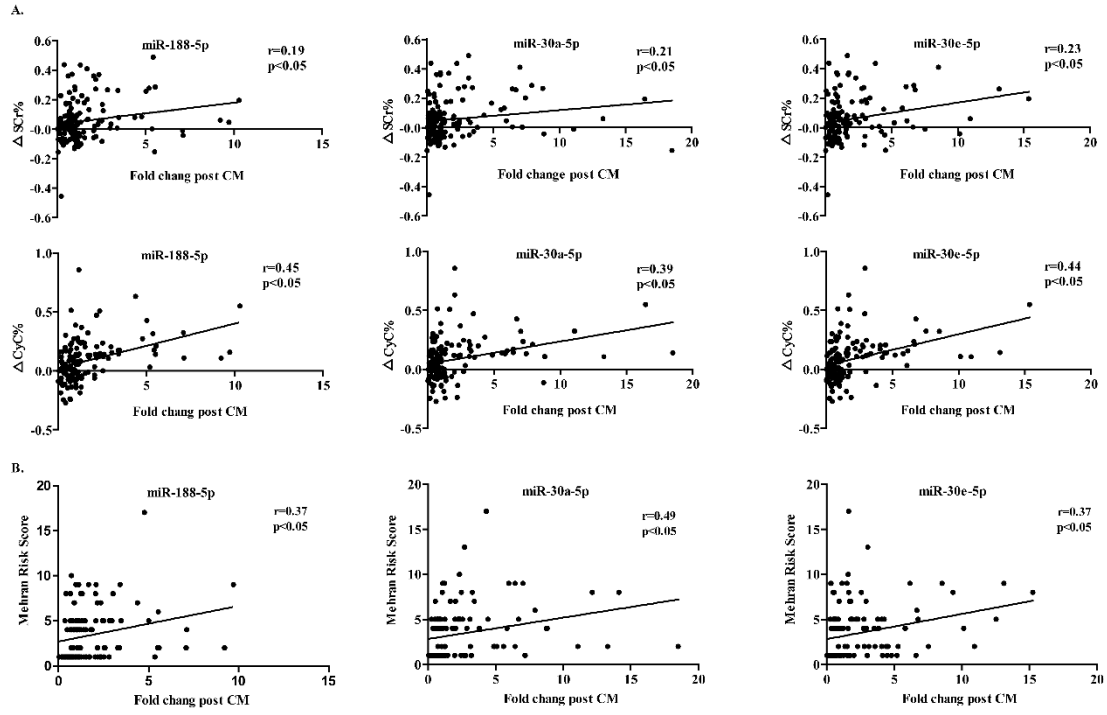

Figure S1.

## Supplementary Figure Legends

**Figure S1. (A)** Correlation analysis of fold change of candidate circulating miRNA levels from baseline with the relative increase in SCr and CyC. **(B)** Correlation analysis of the fold change of candidate circulating miRNA levels with Mehran Risk Scores.  $r$ , Pearson correlation coefficient;  $p$ , relative computed p-value.
